# Supplementary material for: COS-Speech: Protocol to develop a core outcome set for dysarthria after stroke for use in clinical practice and research
Source: Research Square preprint supplement (doi:10.21203/rs.3.rs-2135560/v1), 2022-10-18
Supplement: Supplementary file [file 54c90a380721cd2db34c2d93.pdf]

## Core Outcome Set Standardised Protocol (COS-STAP) checklist

**Core Outcome Set-STandards Protocol Items: The COS-STAP Statement Checklist**

| SECTION/TOPIC             | ITEM No. | CHECKLIST ITEM                                                                                                                                                                                                                                                                        | REPORTED ON PAGE NUMBER |
|---------------------------|----------|---------------------------------------------------------------------------------------------------------------------------------------------------------------------------------------------------------------------------------------------------------------------------------------|-------------------------|
| <b>TITLE/ABSTRACT</b>     |          |                                                                                                                                                                                                                                                                                       |                         |
| Title                     | 1a       | Identify in the title that the paper describes the protocol for the planned development of a COS                                                                                                                                                                                      | 1                       |
| Abstract                  | 1b       | Provide a structured abstract                                                                                                                                                                                                                                                         | 2 and 3                 |
| <b>INTRODUCTION</b>       |          |                                                                                                                                                                                                                                                                                       |                         |
| Background and objectives | 2a       | Describe the background and explain the rationale for developing the COS, and identify the reasons why a COS is needed and the potential barriers to its implementation                                                                                                               | 4 and 5                 |
|                           | 2b       | Describe the specific objectives with reference to developing a COS                                                                                                                                                                                                                   | 4 and 5                 |
| Scope                     | 3a       | Describe the health condition(s) and population(s) that will be covered by the COS                                                                                                                                                                                                    | 5                       |
|                           | 3b       | Describe the intervention(s) that will be covered by the COS                                                                                                                                                                                                                          | 5                       |
|                           | 3c       | Describe the context of use for which the COS is to be applied                                                                                                                                                                                                                        | 5                       |
| <b>METHODS</b>            |          |                                                                                                                                                                                                                                                                                       |                         |
| Stakeholders              | 4        | Describe the stakeholder groups to be involved in the COS development process, the nature of and rationale for their involvement and also how the individuals will be identified; this should cover involvement both as members of the research team and as participants in the study | 5,6 and 8               |
| Information sources       | 5a       | Describe the information sources that will be used to identify the list of outcomes. Outline the methods or reference other protocols/papers                                                                                                                                          | 8                       |
|                           | 5b       | Describe how outcomes may be dropped/combined, with reasons                                                                                                                                                                                                                           | 10                      |
| Consensus process         | 6        | Describe the plans for how the consensus process will be undertaken                                                                                                                                                                                                                   | 10                      |
| Consensus definition      | 7a       | Describe the consensus definition                                                                                                                                                                                                                                                     | 10 and 11               |
|                           | 7b       | Describe the procedure for determining how outcomes will be added/combined/dropped from consideration during the consensus process                                                                                                                                                    | 10 and 11               |
| <b>ANALYSIS</b>           |          |                                                                                                                                                                                                                                                                                       |                         |
| Outcome scoring/feedback  | 8        | Describe how outcomes will be scored and summarised, describe how participants will receive feedback during the consensus process                                                                                                                                                     | 9                       |
| Missing data              | 9        | Describe how missing data will be handled during the consensus process                                                                                                                                                                                                                | 10                      |

| ETHICS and DISSEMINATION         |    |                                                                                                                                                                                                      |    |
|----------------------------------|----|------------------------------------------------------------------------------------------------------------------------------------------------------------------------------------------------------|----|
| Ethics approval/informed consent | 10 | Describe any plans for obtaining research ethics committee/institutional review board approval in relation to the consensus process and describe how informed consent will be obtained (if relevant) | 14 |
| Dissemination                    | 11 | Describe any plans to communicate the results to study participants and COS users, inclusive of methods and timing of dissemination                                                                  | 11 |
| ADMINISTRATIVE INFORMATION       |    |                                                                                                                                                                                                      |    |
| Funders                          | 12 | Describe sources of funding, role of funders                                                                                                                                                         | 14 |
| Conflicts of interest            | 13 | Describe any potential conflicts of interest within the study team and how they will be managed                                                                                                      | 13 |

From: Kirkham JJ, Gorst S, Altman DG, et al. (2019) Core Outcome Set-STANDARDISED Protocol Items: the COS-STAP Statement. *Trials* 20, 116. <https://doi.org/10.1186/s13063-019-3230-x>
